## **In Silico Prediction and Comparison of Resistomes in Model Pseudomonas Strains by Resistance Gene Identifier (RGI)**

This manuscript has been removed owing to an apparent copyright violation resulting from a fraudulent submission.
